# Supplementary material
Source: PubMed Central journal article supplement (PMC2692098)
Supplement: NIHMS109082-supplement-supplement_1.pdf [file NIHMS109082-supplement-supplement_1.pdf]

Fisher's PLSD *post hoc* test applied to main effects),  $^{XX}P < 0.01$ ,  $^XP < 0.05$  versus all groups (ANOVA, Greenhouse-Geisser correction applied to interaction term of all repeated factors; N = 8 per group).

Supplementary Figure 1. DGL- $\alpha$  and CB<sub>1</sub> cannabinoid receptor are present on opposite sides of primary nociceptive synapses in the rat dorsal spinal cord

(A,B) Light micrographs of peroxidase-based immunocytochemistry illustrate high density of DGL- $\alpha$ -immunoreactivity (A) and strong CB<sub>1</sub>-immunolabeling (B) in the dorsal horn of the rat spinal cord. (C,D) High-resolution electron microscopic analysis of DGL- $\alpha$ -immunostaining reveals that DGL- $\alpha$  is located perisynaptically, in the heads of dendritic spines ( $s_1$ ,  $s_2$ ) and in dendritic shafts ( $d_1$ ,  $d_2$ ,  $d_3$ ), demonstrated by the dense end product of the immunoperoxidase reaction (DAB, depicted by double arrowheads) in the rat spinal dorsal horn. These postsynaptic profiles receive innervation from DGL- $\alpha$ -immunonegative type I synaptic glomeruli (C-nociceptive terminal in C) and type II synaptic glomeruli (A $\delta$ -nociceptive terminal in D) (asymmetrical synapses are marked by arrowheads). (E<sub>1</sub>-G) High-power electron micrographs of immunoperoxidase staining for CB<sub>1</sub> confirm presynaptic localization of the receptor (DAB precipitate, indicated by double arrowheads) in small axon terminals ( $b_1$  and  $b_2$  in E<sub>1</sub>-E<sub>2</sub>, and  $b$  in F), and C- (type I synaptic glomerulus in F, dense core vesicles are depicted by arrows) and A $\delta$ -fiber (type II synaptic glomerulus in G, 't' labels a neighboring axon terminal) nociceptive terminals forming asymmetric, excitatory synapses (arrowheads) in the rat dorsal spinal cord. Scale bars: A-B, 100  $\mu$ m; C-F, 0.1  $\mu$ m.

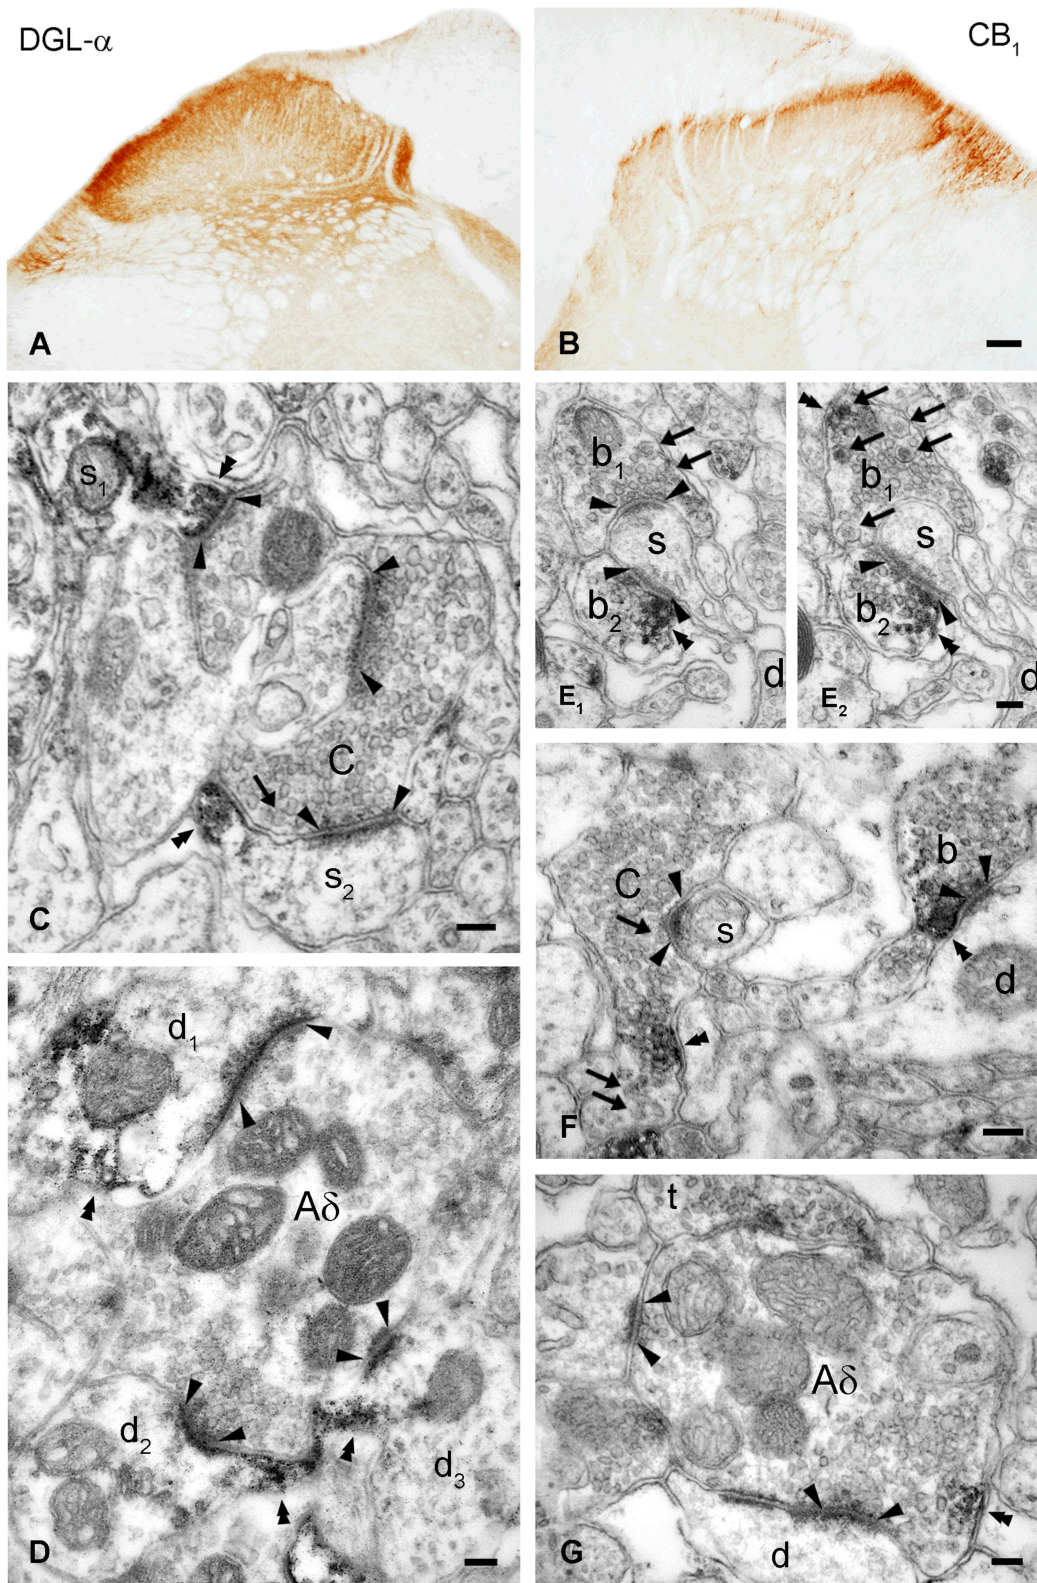

Supplementary Figure 1. Nyilas et al, 2009 EJN
